# Supplementary material for: Protozoan Parasites in Adult Dairy Small Ruminants and Potential Predictors for Their Presence in Faecal Samples
Source: MDPI journal article supplement (doi:10.3390/microorganisms10101931), 2022-09-28
Supplement: s1 [file s1]

# Protozoan Parasites in Dairy Small Ruminants and Potential Risk Factors for their Presence in Faecal Samples

Daphne T. Lianou, Konstantinos Arsenopoulos, Charalambia K. Michael, Elias Papadopoulos, and George C. Fthenakis

**Table S1.** Presence of protozoan parasites in faecal samples from individual animals in small ruminant farms, in which protozoa had been found in pooled faecal samples, in Greece.

| Protozoan parasites    | No. of farms in which protozoa were found in pooled faecal samples and faecal samples from individual animals were also examined | No. of animals present in these farms | No. of animals sampled in these farms | No. of animals in the faecal samples of which protozoa were found | Overall prevalence of recovery of protozoa in samples from individual animals | Among farms median prevalence of recovery of protozoa in samples from individual animals |
|------------------------|----------------------------------------------------------------------------------------------------------------------------------|---------------------------------------|---------------------------------------|-------------------------------------------------------------------|-------------------------------------------------------------------------------|------------------------------------------------------------------------------------------|
| Sheep flocks           |                                                                                                                                  |                                       |                                       |                                                                   |                                                                               |                                                                                          |
| <i>Eimeria</i>         | 65 (27.9% <sup>1</sup> )                                                                                                         | 16,041                                | 1,830                                 | 1,807                                                             | 98.7%                                                                         | 100.0%                                                                                   |
| <i>Giardia</i>         | 35 (33.0%)                                                                                                                       | 8,256                                 | 980                                   | 916                                                               | 93.5%                                                                         | 93.3%                                                                                    |
| <i>Cryptosporidium</i> | 11 (47.8%)                                                                                                                       | 4,758                                 | 360                                   | 346                                                               | 96.1%                                                                         | 96.7%                                                                                    |
| Goats herds            |                                                                                                                                  |                                       |                                       |                                                                   |                                                                               |                                                                                          |
| <i>Eimeria</i>         | 25 (34.7%)                                                                                                                       | 6,497                                 | 760                                   | 723                                                               | 95.1%                                                                         | 95.0%                                                                                    |
| <i>Giardia</i>         | 8 (20.0%)                                                                                                                        | 1,769                                 | 230                                   | 220                                                               | 95.7%                                                                         | 95.0%                                                                                    |
| <i>Cryptosporidium</i> | 5 (38.5%)                                                                                                                        | 2,300                                 | 190                                   | 183                                                               | 96.3%                                                                         | 95.0%                                                                                    |

<sup>1</sup> figures in brackets indicate the proportion of these farms among all those from which protozoa had been found in pooled faecal samples.

**Table S2.** Presence of protozoan parasites in faecal samples from individual animals in small ruminant farms, in which protozoa had not been found in pooled faecal samples, in Greece.

| Protozoan parasites    | No. of farms in which protozoa were not found in pooled faecal samples and faecal samples from individual animals were also examined | No. of animals present in these farms | No. of animals sampled in these farms | No. of animals in the faecal samples of which protozoa were found | Overall prevalence of recovery of protozoa in samples from individual animals | Among farms median prevalence of recovery of protozoa in samples from individual animals |
|------------------------|--------------------------------------------------------------------------------------------------------------------------------------|---------------------------------------|---------------------------------------|-------------------------------------------------------------------|-------------------------------------------------------------------------------|------------------------------------------------------------------------------------------|
| Sheep flocks           |                                                                                                                                      |                                       |                                       |                                                                   |                                                                               |                                                                                          |
| <i>Eimeria</i>         | 22 (23.9% <sup>1</sup> )                                                                                                             | 5,636                                 | 630                                   | 0                                                                 | 0.0%                                                                          | 0.0%                                                                                     |
| <i>Giardia</i>         | 55 (25.1%)                                                                                                                           | 14,261                                | 1,570                                 | 0                                                                 | 0.0%                                                                          | 0.0%                                                                                     |
| <i>Cryptosporidium</i> | 80 (26.5%)                                                                                                                           | 19,409                                | 2,240                                 | 0                                                                 | 0.0%                                                                          | 0.0%                                                                                     |
| Goats herds            |                                                                                                                                      |                                       |                                       |                                                                   |                                                                               |                                                                                          |
| <i>Eimeria</i>         | 8 (17.0%)                                                                                                                            | 1,255                                 | 200                                   | 0                                                                 | 0.0%                                                                          | 0.0%                                                                                     |
| <i>Giardia</i>         | 25 (31.6%)                                                                                                                           | 5,983                                 | 730                                   | 0                                                                 | 0.0%                                                                          | 0.0%                                                                                     |
| <i>Cryptosporidium</i> | 31 (29.2%)                                                                                                                           | 6,842                                 | 880                                   | 0                                                                 | 0.0%                                                                          | 0.0%                                                                                     |

<sup>1</sup> figures in brackets indicate the proportion of these farms among all those from which protozoa had not been found in pooled faecal samples.

---

**Table S3.** Variables ( $n = 31$ ) evaluated for potential association with presence of protozoan parasites in faecal samples from 444 small ruminant farms in Greece.

---

|                                                                                                                |
|----------------------------------------------------------------------------------------------------------------|
| Management system applied in the farm (description according to EFSA classification)                           |
| Years at the location (no. of years)                                                                           |
| Month into the lactation period at sampling (month)                                                            |
| Availability of a main building for animals (yes / no)                                                         |
| Availability of a designated building for lambs / kids (yes / no)                                              |
| Availability of a designated lambing / kidding area (yes / no)                                                 |
| Availability of a lavatory (yes / no)                                                                          |
| Material of the floor of the barn (soil / other)                                                               |
| Availability of straw bedding (yes / no)                                                                       |
| Annual frequency of removal / clean-up of the straw bedding (no. of occasions)                                 |
| Grazing practiced (yes / no)                                                                                   |
| Grazing land available to animals (acres per animal)                                                           |
| No. of female animals in the farm (no.)                                                                        |
| Breed of ewes /does (description)                                                                              |
| Month of the start of the lambing / kidding season (description)                                               |
| Collaboration with a veterinarian (yes / no)                                                                   |
| Use of laboratory diagnostic examinations in faecal samples preventively (yes / no)                            |
| Means of calculating live bodyweight for the administration of pharmaceutical products (weighing / estimation) |
| Routine overdosing (compared to dose prescribed) of pharmaceuticals (yes / no)                                 |
| Total visits made annually by veterinarians to the farm during the preceding season (no.)                      |
| Application of reproductive control practices in the farm (yes / no)                                           |
| Newborn care and specific monitoring (yes / no)                                                                |
| Lamb / kid fostering to female animals other than their dams (yes / no)                                        |
| Administration of a lamb- / kid-specific diet (yes / no)                                                       |
| Age of lamb / kid removal from their dams (days)                                                               |
| Seasonal transfer of animals to other site (yes / no)                                                          |
| Manure management (spread in the fields / removed otherwise)                                                   |
| Annual frequency of systemic disinfections in the farm (no.)                                                   |
| Shearing of animals (yes / no)                                                                                 |
| Provision of finished feed (concentrate) to animals throughout the year (yes / no)                             |
| Provision of finished feed (concentrate) to young animals (yes / no)                                           |

---

**Table S4.** Geographical areas of Greece ( $n = 4$ ), in which administrative regions and regional units of the country were clustered, for characterizing location of 444 small ruminant farms from which faecal samples were collected.

|                                                                                      |
|--------------------------------------------------------------------------------------|
| <b>Central</b>                                                                       |
| Region of Central Greece                                                             |
| Region of Thessaly                                                                   |
| From the region of Epirus: regional unit of Arta and regional unit of Preveza        |
| From the region of Western Greece: regional unit of Aetolia-Acarnania                |
| <b>Islands</b>                                                                       |
| Region of Crete                                                                      |
| Region of Ionian islands                                                             |
| Region of North Aegean                                                               |
| Region of South Aegean                                                               |
| <b>North</b>                                                                         |
| Region of Central Macedonia                                                          |
| Region of Eastern Macedonia and Thrace                                               |
| Region of Western Macedonia                                                          |
| From the region of Epirus: regional unit of Ioannina and regional unit of Thesprotia |
| <b>South</b>                                                                         |
| Region of Attica                                                                     |
| Region of Peloponnese                                                                |
| Region of Western Macedonia                                                          |
| From the region of Western Greece: regional unit of Achaia and regional unit of Elis |

---

**Figure S1.** Map of Greece indicating the geographic areas of the country ( $n = 4$ ), in which administrative regions and regional units of the country were clustered, for characterizing location of 444 small ruminant farms from which faecal samples were collected (blue: Central, green: Islands, yellow: North, red: South).

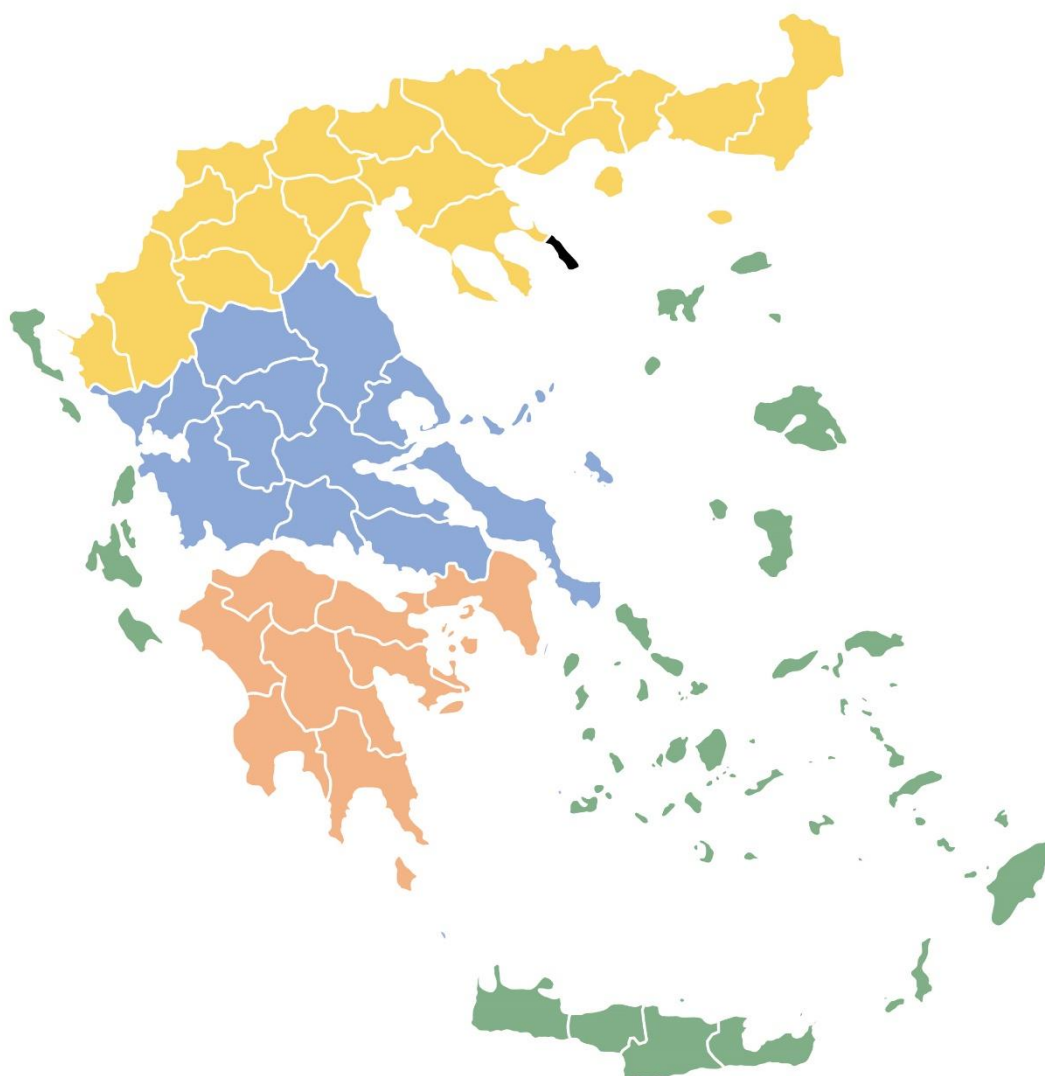

**Table S5.** Details of multivariable models employed for the evaluation of the presence of protozoan parasites in faecal samples from 444 small ruminant farms in Greece.

| Outcome                                                             | Variables offered to the multivariable models ( <i>n</i> ) | Variables required in the final models                                                                                                                                                                                                                                                                                                                                                     |
|---------------------------------------------------------------------|------------------------------------------------------------|--------------------------------------------------------------------------------------------------------------------------------------------------------------------------------------------------------------------------------------------------------------------------------------------------------------------------------------------------------------------------------------------|
| Presence of <i>Eimeria</i> in faecal samples – sheep flocks         | 5                                                          | (a) Availability of a designated building for lambs, (b) Collaboration with a veterinarian, (c) Means of calculating live bodyweight for the administration of pharmaceutical products                                                                                                                                                                                                     |
| Presence of <i>Eimeria</i> in faecal samples – goat herds           | 9                                                          | (a) Availability of a designated building for kids, (b) Grazing practiced, (c) Collaboration with a veterinarian, (d) Means of calculating live bodyweight for the administration of pharmaceutical products, (e) Age of kid removal from their dams                                                                                                                                       |
| Presence of <i>Giardia</i> in pooled faecal samples – sheep flocks  | 5                                                          | (a) Years at the location, (b) Grazing practiced, (c) Application of reproductive control practices in the farm                                                                                                                                                                                                                                                                            |
| Presence of <i>Giardia</i> in pooled faecal samples – goat herds    | 3                                                          | (a) Availability of a main building for animals, (b) Application of reproductive control practices in the farm                                                                                                                                                                                                                                                                             |
| Presence of <i>Cryptosporidium</i> in faecal samples – sheep flocks | 13                                                         | (a) Management system applied in the farm, (b) Years at the present location, (c) Availability of a designated building for lambs, (d) Grazing practiced, (e) Breed of ewes, (f) Routine overdosing of pharmaceuticals, (g) Lamb fostering to female animals other than their dams, (h) Annual frequency of systemic disinfections in the farm                                             |
| Presence of <i>Cryptosporidium</i> in faecal samples – goat herds   | 13                                                         | (a) Management system applied in the farm, (b) Availability of straw bedding, (c) Annual frequency of removal / clean-up of the straw bedding, (d) Grazing practiced, (e) Means of calculating live bodyweight for the administration of pharmaceutical products, (f) Application of reproductive control practices in the farm, (g) Kid fostering to female animals other than their dams |

**Table S6.** Associations of presence of *Eimeria* in faecal samples from 325 sheep flocks in Greece, as found in univariable analysis.

| Number of farms                                                           |                           |                                  |                    |                                                                             |                          |                                 |                   | <i>p</i> |
|---------------------------------------------------------------------------|---------------------------|----------------------------------|--------------------|-----------------------------------------------------------------------------|--------------------------|---------------------------------|-------------------|----------|
| Farms with presence of <i>Eimeria</i> in faecal samples ( <i>n</i> = 233) |                           |                                  |                    | Farms with no presence of <i>Eimeria</i> in faecal samples ( <i>n</i> = 92) |                          |                                 |                   |          |
| Management system applied in the farm                                     |                           |                                  |                    |                                                                             |                          |                                 |                   |          |
| Intensive<br>35/43                                                        | Semi-intensive<br>104/151 | Semi-extensive<br>76/107         | Extensive<br>18/24 | Intensive<br>8/43                                                           | Semi-intensive<br>47/151 | Semi-extensive<br>31/107        | Extensive<br>6/24 | 0.43     |
| Years at the present location                                             |                           |                                  |                    |                                                                             |                          |                                 |                   |          |
| 0 – 2<br>4/5                                                              |                           | 3 – 5<br>29/40                   | > 5<br>200/280     | 0 – 2<br>1/5                                                                |                          | 3 – 5<br>11/40                  | > 5<br>80/280     | 0.91     |
| Month into the lactation period at sampling                               |                           |                                  |                    |                                                                             |                          |                                 |                   |          |
| 0–1st<br>16/23                                                            | 2nd–5th<br>93/138         | 6th–9th<br>109/147               | After 9th<br>15/17 | 0–1st<br>7/23                                                               | 2nd–5th<br>45/138        | 6th–9th<br>38/147               | After 9th<br>2/17 | 0.26     |
| Availability of a main building for animals                               |                           |                                  |                    |                                                                             |                          |                                 |                   |          |
| Yes<br>229/318                                                            |                           | No<br>4/7                        |                    | Yes<br>89/318                                                               |                          | No<br>3/7                       |                   | 0.39     |
| Availability of a designated building for lambs                           |                           |                                  |                    |                                                                             |                          |                                 |                   |          |
| Yes<br>165/243                                                            |                           | No<br>68/82                      |                    | Yes<br>78/243                                                               |                          | No<br>14/82                     |                   | 0.009    |
| Availability of a designated lambing area                                 |                           |                                  |                    |                                                                             |                          |                                 |                   |          |
| Yes<br>123/173                                                            |                           | No<br>110/152                    |                    | Yes<br>50/173                                                               |                          | No<br>42/152                    |                   | 0.80     |
| Availability of a lavatory                                                |                           |                                  |                    |                                                                             |                          |                                 |                   |          |
| Yes<br>97/143                                                             |                           | No<br>136/182                    |                    | Yes<br>46/143                                                               |                          | No<br>46/182                    |                   | 0.17     |
| Material of the floor of the barn                                         |                           |                                  |                    |                                                                             |                          |                                 |                   |          |
| Soil<br>208/292                                                           |                           | Other<br>25/33                   |                    | Soil<br>84/292                                                              |                          | Other<br>8/33                   |                   | 0.58     |
| Availability of straw bedding                                             |                           |                                  |                    |                                                                             |                          |                                 |                   |          |
| Yes<br>189/268                                                            |                           | No<br>44/57                      |                    | Yes<br>79/268                                                               |                          | No<br>13/57                     |                   | 0.31     |
| Annual frequency of removal / clean-up of the straw bedding               |                           |                                  |                    |                                                                             |                          |                                 |                   |          |
| 1 – 2<br>114/166                                                          |                           | > 2<br>75/102                    |                    | 1 – 2<br>52/166                                                             |                          | > 2<br>27/102                   |                   | 0.40     |
| Grazing practiced                                                         |                           |                                  |                    |                                                                             |                          |                                 |                   |          |
| Yes<br>199/281                                                            |                           | No<br>34/44                      |                    | Yes<br>82/281                                                               |                          | No<br>10/44                     |                   | 0.38     |
| Grazing land available to animals                                         |                           |                                  |                    |                                                                             |                          |                                 |                   |          |
| 0 – 0.5 acre per animals<br>48/74                                         |                           | > 0.5 acre per animal<br>151/207 |                    | 0 – 0.5 acre per animals<br>26/74                                           |                          | > 0.5 acre per animal<br>56/207 |                   | 0.19     |

|                                                                                        |              |                 |               |              |                 |           |               |      |
|----------------------------------------------------------------------------------------|--------------|-----------------|---------------|--------------|-----------------|-----------|---------------|------|
|                                                                                        |              |                 |               |              |                 |           |               |      |
| No. of female animals in the farm                                                      |              |                 |               |              |                 |           |               |      |
| 0 – 165                                                                                | 166 – 330    | 331 – 500       | > 500         | 0 – 165      | 166 – 330       | 331 – 500 | > 500         |      |
| 70/88                                                                                  | 78/120       | 49/66           | 36/51         | 18/88        | 42/120          | 17/66     | 15/51         | 0.13 |
| Breed of ewes                                                                          |              |                 |               |              |                 |           |               |      |
| Cross-breeds                                                                           | Greek breeds | Imported breeds | Cross-breeds  | Greek breeds | Imported breeds |           |               |      |
| 29/43                                                                                  | 105/143      | 99/139          | 14/43         | 38/143       | 40/139          | 0.74      |               |      |
| Month of the start of the lambing season                                               |              |                 |               |              |                 |           |               |      |
| All year                                                                               | Autumn       | Winter          | Spring-Summer | All year     | Autumn          | Winter    | Spring-Summer |      |
| 15/18                                                                                  | 170/245      | 43/55           | 5/7           | 3/18         | 75/245          | 12/55     | 2/7           | 0.39 |
| Collaboration with a veterinarian                                                      |              |                 |               |              |                 |           |               |      |
| Yes                                                                                    | No           |                 | Yes           | No           |                 |           |               |      |
| 203/277                                                                                | 30/48        |                 | 74/277        | 18/48        |                 | 0.13      |               |      |
| Use of laboratory diagnostic examinations in faecal samples preventively               |              |                 |               |              |                 |           |               |      |
| Yes                                                                                    | No           |                 | Yes           | No           |                 |           |               |      |
| 25/34                                                                                  | 208/291      |                 | 9/34          | 83/291       |                 | 0.80      |               |      |
| Means of calculating live bodyweight for the administration of pharmaceutical products |              |                 |               |              |                 |           |               |      |
| Weighing                                                                               | Estimation   |                 | Weighing      | Estimation   |                 |           |               |      |
| 46/73                                                                                  | 187/252      |                 | 27/73         | 65/252       |                 | 0.06      |               |      |
| Routine overdosing (compared to dose prescribed) of pharmaceuticals                    |              |                 |               |              |                 |           |               |      |
| Yes                                                                                    | No           |                 | Yes           | No           |                 |           |               |      |
| 45/61                                                                                  | 188/264      |                 | 16/61         | 76/264       |                 | 0.69      |               |      |
| Total visits made annually by veterinarians to the farm during the preceding season    |              |                 |               |              |                 |           |               |      |
| 0 – 4                                                                                  | 5 – 7        | > 7             | 0 – 4         | 5 – 7        | > 7             |           |               |      |
| 99/139                                                                                 | 61/86        | 73/100          | 40/139        | 25/86        | 27/100          | 0.94      |               |      |
| Application of reproductive control practices in the farm                              |              |                 |               |              |                 |           |               |      |
| Yes                                                                                    | No           |                 | Yes           | No           |                 |           |               |      |
| 73/101                                                                                 | 160/224      |                 | 28/101        | 64/224       |                 | 0.88      |               |      |
| Newborn care and specific monitoring                                                   |              |                 |               |              |                 |           |               |      |
| Yes                                                                                    | No           |                 | Yes           | No           |                 |           |               |      |
| 209/293                                                                                | 24/32        |                 | 84/293        | 8/32         |                 | 0.66      |               |      |
| Lamb fostering to female animals other than their dams                                 |              |                 |               |              |                 |           |               |      |
| Yes                                                                                    | No           |                 | Yes           | No           |                 |           |               |      |
| 157/221                                                                                | 76/104       |                 | 64/221        | 28/104       |                 | 0.70      |               |      |
| Administration of a lamb-specific diet                                                 |              |                 |               |              |                 |           |               |      |
| Yes                                                                                    | No           |                 | Yes           | No           |                 |           |               |      |
| 161/226                                                                                | 72/99        |                 | 65/226        | 27/99        |                 | 0.78      |               |      |



|                                                                         |                          |                                |                          |                        |                   |      |
|-------------------------------------------------------------------------|--------------------------|--------------------------------|--------------------------|------------------------|-------------------|------|
| Age of lamb removal from their dams                                     |                          |                                |                          |                        |                   |      |
| < 45 days<br>85/119                                                     | 45 – 60 days<br>121/170  | > 60 days<br>27/36             | < 45 days<br>34/119      | 45 – 60 days<br>49/170 | > 60 days<br>9/36 | 0.90 |
| Seasonal transfer of animals to other site                              |                          |                                |                          |                        |                   |      |
| Yes<br>33/49                                                            | No<br>200/276            | Yes<br>16/49                   | No<br>76/276             |                        |                   | 0.46 |
| Manure management                                                       |                          |                                |                          |                        |                   |      |
| Spread in the fields<br>230/320                                         | Removed otherwise<br>3/5 | Spread in the fields<br>90/320 | Removed otherwise<br>2/5 |                        |                   | 0.56 |
| Annual frequency of systemic disinfections in the farm                  |                          |                                |                          |                        |                   |      |
| 0 – 9<br>209/293                                                        | > 9<br>24/32             | 0 – 9<br>84/293                | > 9<br>8/32              |                        |                   | 0.66 |
| Shearing of animals                                                     |                          |                                |                          |                        |                   |      |
| Yes<br>228/319                                                          | No<br>5/6                | Yes<br>91/319                  | No<br>1/6                |                        |                   | 0.52 |
| Provision of finished feed (concentrate) to animals throughout the year |                          |                                |                          |                        |                   |      |
| Yes<br>216/304                                                          | No<br>17/21              | Yes<br>88/304                  | No<br>4/21               |                        |                   | 0.33 |
| Provision of finished feed (concentrate) to young animals               |                          |                                |                          |                        |                   |      |
| Yes<br>185/255                                                          | No<br>48/70              | Yes<br>70/255                  | No<br>22/70              |                        |                   | 0.51 |

**Table S7.** Associations of presence of *Eimeria* in faecal samples from 119 goat herds in Greece, as found in univariable analysis.

| Number of farms                                                          |                         |                         |                    |                                                                             |                         |                         |                   | <i>p</i> |
|--------------------------------------------------------------------------|-------------------------|-------------------------|--------------------|-----------------------------------------------------------------------------|-------------------------|-------------------------|-------------------|----------|
| Farms with presence of <i>Eimeria</i> in faecal samples ( <i>n</i> = 72) |                         |                         |                    | Farms with no presence of <i>Eimeria</i> in faecal samples ( <i>n</i> = 47) |                         |                         |                   |          |
| Management system applied in the farm                                    |                         |                         |                    |                                                                             |                         |                         |                   |          |
| Intensive<br>3/9                                                         | Semi-intensive<br>16/29 | Semi-extensive<br>39/61 | Extensive<br>14/20 | Intensive<br>6/9                                                            | Semi-intensive<br>13/29 | Semi-extensive<br>22/61 | Extensive<br>6/20 | 0.24     |
| Years at the present location                                            |                         |                         |                    |                                                                             |                         |                         |                   |          |
| 0 – 2<br>1/1                                                             | 3 – 5<br>9/15           | > 5<br>62/103           | 0 – 2<br>0/1       | 3 – 5<br>6/15                                                               | > 5<br>41/103           |                         |                   | 0.72     |
| Month into the lactation period at sampling                              |                         |                         |                    |                                                                             |                         |                         |                   |          |
| 0–1st<br>4/8                                                             | 2nd–5th<br>43/60        | 6th–9th<br>22/43        | After 9th<br>3/8   | 0–1st<br>4/8                                                                | 2nd–5th<br>17/60        | 6th–9th<br>21/43        | After 9th<br>5/8  | 0.08     |
| Availability of a main building for animals                              |                         |                         |                    |                                                                             |                         |                         |                   |          |
| Yes<br>71/117                                                            | No<br>1/2               | Yes<br>46/117           | No<br>1/2          |                                                                             |                         |                         |                   | 0.76     |
| Availability of a designated building for kids                           |                         |                         |                    |                                                                             |                         |                         |                   |          |
| Yes<br>47/86                                                             | No<br>25/33             | Yes<br>39/86            | No<br>8/33         |                                                                             |                         |                         |                   | 0.035    |
| Availability of a designated kidding area                                |                         |                         |                    |                                                                             |                         |                         |                   |          |
| Yes<br>34/58                                                             | No<br>38/61             | Yes<br>24/58            | No<br>23/61        |                                                                             |                         |                         |                   | 0.68     |
| Availability of a lavatory                                               |                         |                         |                    |                                                                             |                         |                         |                   |          |
| Yes<br>20/38                                                             | No<br>52/81             | Yes<br>18/38            | No<br>29/81        |                                                                             |                         |                         |                   | 0.23     |
| Material of the floor of the barn                                        |                         |                         |                    |                                                                             |                         |                         |                   |          |
| Soil<br>65/105                                                           | Other<br>7/14           | Soil<br>40/105          | Other<br>7/14      |                                                                             |                         |                         |                   | 0.39     |
| Availability of straw bedding                                            |                         |                         |                    |                                                                             |                         |                         |                   |          |
| Yes<br>43/76                                                             | No<br>29/43             | Yes<br>33/76            | No<br>14/43        |                                                                             |                         |                         |                   | 0.24     |
| Annual frequency of removal / clean-up of the straw bedding              |                         |                         |                    |                                                                             |                         |                         |                   |          |
| 1 – 2<br>25/42                                                           | > 2<br>18/34            | 1 – 2<br>17/42          | > 2<br>16/34       |                                                                             |                         |                         |                   | 0.56     |
| Grazing practiced                                                        |                         |                         |                    |                                                                             |                         |                         |                   |          |
| Yes<br>71/113                                                            | No<br>1/6               | Yes<br>42/113           | No<br>5/6          |                                                                             |                         |                         |                   | 0.024    |

|                                                                                        |           |                       |               |                          |           |                       |               |       |
|----------------------------------------------------------------------------------------|-----------|-----------------------|---------------|--------------------------|-----------|-----------------------|---------------|-------|
| Grazing land available to animals                                                      |           |                       |               |                          |           |                       |               |       |
| 0 – 0.5 acre per animals                                                               |           | > 0.5 acre per animal |               | 0 – 0.5 acre per animals |           | > 0.5 acre per animal |               | 0.95  |
| 7/11                                                                                   |           | 64/102                |               | 4/11                     |           | 38/102                |               |       |
| No. of female animals in the farm                                                      |           |                       |               |                          |           |                       |               |       |
| 0 – 165                                                                                | 166 – 330 | 331 – 500             | > 500         | 0 – 165                  | 166 – 330 | 331 – 500             | > 500         | 0.62  |
| 32/56                                                                                  | 22/37     | 8/13                  | 10/13         | 24/56                    | 15/37     | 5/13                  | 3/13          |       |
| Breed of does                                                                          |           |                       |               |                          |           |                       |               |       |
| Cross-breeds                                                                           |           | Greek breeds          |               | Imported breeds          |           | Imported breeds       |               | 0.31  |
| 8/18                                                                                   |           | 36/56                 |               | 28/45                    |           | 17/45                 |               |       |
| Month of the start of the kidding season                                               |           |                       |               |                          |           |                       |               |       |
| All year                                                                               | Autumn    | Winter                | Spring-Summer | All year                 | Autumn    | Winter                | Spring-Summer | 0.76  |
| 4/8                                                                                    | 37/63     | 29/44                 | 2/4           | 4/8                      | 26/63     | 15/44                 | 2/4           |       |
| Collaboration with a veterinarian                                                      |           |                       |               |                          |           |                       |               |       |
| Yes                                                                                    |           | No                    |               | Yes                      |           | No                    |               | 0.010 |
| 66/101                                                                                 |           | 6/18                  |               | 35/101                   |           | 12/18                 |               |       |
| Use of laboratory diagnostic examinations in faecal samples preventively               |           |                       |               |                          |           |                       |               |       |
| Yes                                                                                    |           | No                    |               | Yes                      |           | No                    |               | 0.036 |
| 8/16                                                                                   |           | 64/103                |               | 8/16                     |           | 39/103                |               |       |
| Means of calculating live bodyweight for the administration of pharmaceutical products |           |                       |               |                          |           |                       |               |       |
| Weighing                                                                               |           | Estimation            |               | Weighing                 |           | Estimation            |               | 0.14  |
| 13/27                                                                                  |           | 59/92                 |               | 14/27                    |           | 33/92                 |               |       |
| Routine overdosing (compared to dose prescribed) of pharmaceuticals                    |           |                       |               |                          |           |                       |               |       |
| Yes                                                                                    |           | No                    |               | Yes                      |           | No                    |               | 0.43  |
| 14/26                                                                                  |           | 58/93                 |               | 12/26                    |           | 35/93                 |               |       |
| Total visits made annually by veterinarians to the farm during the preceding season    |           |                       |               |                          |           |                       |               |       |
| 0 – 4                                                                                  | 5 – 7     | > 7                   |               | 0 – 4                    | 5 – 7     | > 7                   |               | 0.08  |
| 25/51                                                                                  | 18/25     | 29/43                 |               | 26/51                    | 7/25      | 14/43                 |               |       |
| Application of reproductive control practices in the farm                              |           |                       |               |                          |           |                       |               |       |
| Yes                                                                                    |           | No                    |               | Yes                      |           | No                    |               | 0.49  |
| 9/17                                                                                   |           | 63/102                |               | 8/17                     |           | 39/102                |               |       |
| Newborn care and specific monitoring                                                   |           |                       |               |                          |           |                       |               |       |
| Yes                                                                                    |           | No                    |               | Yes                      |           | No                    |               | 0.97  |
| 66/109                                                                                 |           | 6/10                  |               | 43/109                   |           | 4/10                  |               |       |
| Kid fostering to female animals other than their dams                                  |           |                       |               |                          |           |                       |               |       |
| Yes                                                                                    |           | No                    |               | Yes                      |           | No                    |               | 0.21  |
| 49/86                                                                                  |           | 23/33                 |               | 37/86                    |           | 10/33                 |               |       |

|                                                                         |                   |                      |                   |              |           |
|-------------------------------------------------------------------------|-------------------|----------------------|-------------------|--------------|-----------|
|                                                                         |                   |                      |                   |              |           |
| Administration of a kid-specific diet                                   |                   |                      |                   |              |           |
| Yes                                                                     | No                | Yes                  | No                |              |           |
| 51/79                                                                   | 21/40             | 28/79                | 19/40             |              | 0.21      |
| Age of kid removal from their dams                                      |                   |                      |                   |              |           |
| < 45 days                                                               | 45 – 60 days      | > 60 days            | < 45 days         | 45 – 60 days | > 60 days |
| 11/26                                                                   | 25/44             | 36/49                | 15/26             | 19/44        | 13/49     |
|                                                                         |                   |                      |                   |              | 0.026     |
| Seasonal transfer of animals to other site                              |                   |                      |                   |              |           |
| Yes                                                                     | No                | Yes                  | No                |              |           |
| 16/28                                                                   | 56/91             | 12/28                | 35/91             |              | 0.68      |
| Manure management                                                       |                   |                      |                   |              |           |
| Spread in the fields                                                    | Removed otherwise | Spread in the fields | Removed otherwise |              |           |
| 66/109                                                                  | 6/10              | 43/109               | 4/10              |              | 0.97      |
| Annual frequency of systemic disinfections in the farm                  |                   |                      |                   |              |           |
| 0 – 9                                                                   | > 9               | 0 – 9                | > 9               |              |           |
| 62/100                                                                  | 10/19             | 38/100               | 9/19              |              | 0.44      |
| Shearing of animals                                                     |                   |                      |                   |              |           |
| Yes                                                                     | No                | Yes                  | No                |              |           |
| 65/102                                                                  | 7/17              | 37/102               | 10/17             |              | 0.08      |
| Provision of finished feed (concentrate) to animals throughout the year |                   |                      |                   |              |           |
| Yes                                                                     | No                | Yes                  | No                |              |           |
| 61/103                                                                  | 11/16             | 42/103               | 5/16              |              | 0.47      |
| Provision of finished feed (concentrate) to young animals               |                   |                      |                   |              |           |
| Yes                                                                     | No                | Yes                  | No                |              |           |
| 48/79                                                                   | 24/40             | 31/79                | 16/40             |              | 0.94      |

**Table S8.** Associations of presence of *Giardia* in faecal samples from 325 sheep flocks in Greece, as found in univariable analysis.

| Number of farms                                                           |                          |                          |                   |                                                                              |                          |                          |                    | <i>p</i> |
|---------------------------------------------------------------------------|--------------------------|--------------------------|-------------------|------------------------------------------------------------------------------|--------------------------|--------------------------|--------------------|----------|
| Farms with presence of <i>Giardia</i> in faecal samples ( <i>n</i> = 106) |                          |                          |                   | Farms with no presence of <i>Giardia</i> in faecal samples ( <i>n</i> = 219) |                          |                          |                    |          |
| Management system applied in the farm                                     |                          |                          |                   |                                                                              |                          |                          |                    |          |
| Intensive<br>8/43                                                         | Semi-intensive<br>59/151 | Semi-extensive<br>32/107 | Extensive<br>7/24 | Intensive<br>35/43                                                           | Semi-intensive<br>92/151 | Semi-extensive<br>75/107 | Extensive<br>17/24 | 0.07     |
| Years at the present location                                             |                          |                          |                   |                                                                              |                          |                          |                    |          |
| 0 – 2<br>2/5                                                              | 3 – 5<br>18/40           | > 5<br>86/280            | 0 – 2<br>3/5      | 3 – 5<br>22/40                                                               | > 5<br>194/280           |                          |                    | 0.18     |
| Month into the lactation period at sampling                               |                          |                          |                   |                                                                              |                          |                          |                    |          |
| 0–1st<br>6/23                                                             | 2nd–5th<br>41/138        | 6th–9th<br>53/147        | After 9th<br>6/17 | 0–1st<br>17/23                                                               | 2nd–5th<br>97/138        | 6th–9th<br>94/147        | After 9th<br>11/17 | 0.61     |
| Availability of a main building for animals                               |                          |                          |                   |                                                                              |                          |                          |                    |          |
| Yes<br>104/318                                                            | No<br>2/7                | Yes<br>214/318           | No<br>5/7         |                                                                              |                          |                          |                    | 0.82     |
| Availability of a designated building for lambs                           |                          |                          |                   |                                                                              |                          |                          |                    |          |
| Yes<br>74/243                                                             | No<br>32/82              | Yes<br>169/243           | No<br>50/82       |                                                                              |                          |                          |                    | 0.15     |
| Availability of a designated lambing area                                 |                          |                          |                   |                                                                              |                          |                          |                    |          |
| Yes<br>61/173                                                             | No<br>45/152             | Yes<br>112/173           | No<br>107/152     |                                                                              |                          |                          |                    | 0.28     |
| Availability of a lavatory                                                |                          |                          |                   |                                                                              |                          |                          |                    |          |
| Yes<br>46/143                                                             | No<br>60/182             | Yes<br>97/143            | No<br>122/182     |                                                                              |                          |                          |                    | 0.88     |
| Material of the floor of the barn                                         |                          |                          |                   |                                                                              |                          |                          |                    |          |
| Soil<br>96/292                                                            | Other<br>10/33           | Soil<br>196/292          | Other<br>23/33    |                                                                              |                          |                          |                    | 0.76     |
| Availability of straw bedding                                             |                          |                          |                   |                                                                              |                          |                          |                    |          |
| Yes<br>85/268                                                             | No<br>21/57              | Yes<br>183/268           | No<br>36/57       |                                                                              |                          |                          |                    | 0.45     |
| Annual frequency of removal / clean-up of the straw bedding               |                          |                          |                   |                                                                              |                          |                          |                    |          |
| 1 – 2<br>48/166                                                           | > 2<br>37/102            | 1 – 2<br>118/166         | > 2<br>65/102     |                                                                              |                          |                          |                    | 0.21     |
| Grazing practiced                                                         |                          |                          |                   |                                                                              |                          |                          |                    |          |
| Yes<br>97/281                                                             | No<br>9/44               | Yes<br>184/281           | No<br>35/44       |                                                                              |                          |                          |                    | 0.06     |

|                                                                                        |                     |                                 |                      |                                    |                     |                                  |                      |      |
|----------------------------------------------------------------------------------------|---------------------|---------------------------------|----------------------|------------------------------------|---------------------|----------------------------------|----------------------|------|
| Grazing land available to animals                                                      |                     |                                 |                      |                                    |                     |                                  |                      |      |
| 0 – 0.5 acre per animals<br>39/118                                                     |                     | > 0.5 acre per animal<br>67/207 |                      | 0 – 0.5 acre per animals<br>79/118 |                     | > 0.5 acre per animal<br>140/207 |                      | 0.90 |
| No. of female animals in the farm                                                      |                     |                                 |                      |                                    |                     |                                  |                      |      |
| 0 – 165<br>36/87                                                                       | 166 – 330<br>37/121 | 331 – 500<br>19/66              | > 500<br>14/51       | 0 – 165<br>51/87                   | 166 – 330<br>84/121 | 331 – 500<br>47/66               | > 500<br>37/51       | 0.23 |
| Breed of ewes                                                                          |                     |                                 |                      |                                    |                     |                                  |                      |      |
| Cross-breeds<br>14/43                                                                  |                     | Greek breeds<br>49/143          |                      | Imported breeds<br>43/139          |                     | Cross-breeds<br>29/43            |                      | 0.84 |
| Month of the start of the lambing season                                               |                     |                                 |                      |                                    |                     |                                  |                      |      |
| All year<br>4/18                                                                       | Autumn<br>83/245    | Winter<br>17/55                 | Spring-Summer<br>2/7 | All year<br>14/18                  | Autumn<br>162/245   | Winter<br>38/55                  | Spring-Summer<br>5/7 | 0.76 |
| Collaboration with a veterinarian                                                      |                     |                                 |                      |                                    |                     |                                  |                      |      |
| Yes<br>94/277                                                                          |                     | No<br>12/48                     |                      | Yes<br>183/277                     |                     | No<br>36/48                      |                      | 0.22 |
| Use of laboratory diagnostic examinations in faecal samples preventively               |                     |                                 |                      |                                    |                     |                                  |                      |      |
| Yes<br>11/34                                                                           |                     | No<br>95/291                    |                      | Yes<br>23/34                       |                     | No<br>196/291                    |                      | 0.97 |
| Means of calculating live bodyweight for the administration of pharmaceutical products |                     |                                 |                      |                                    |                     |                                  |                      |      |
| Weighing<br>19/73                                                                      |                     | Estimation<br>87/252            |                      | Weighing<br>54/73                  |                     | Estimation<br>165/252            |                      | 0.17 |
| Routine overdosing (compared to dose prescribed) of pharmaceuticals                    |                     |                                 |                      |                                    |                     |                                  |                      |      |
| Yes<br>21/61                                                                           |                     | No<br>85/264                    |                      | Yes<br>40/61                       |                     | No<br>179/264                    |                      | 0.74 |
| Total visits made annually by veterinarians to the farm during the preceding season    |                     |                                 |                      |                                    |                     |                                  |                      |      |
| 0 – 4<br>47/139                                                                        | 5 – 7<br>27/86      | > 7<br>32/100                   |                      | 0 – 4<br>92/139                    | 5 – 7<br>59/86      | > 7<br>68/100                    |                      | 0.92 |
| Application of reproductive control practices in the farm                              |                     |                                 |                      |                                    |                     |                                  |                      |      |
| Yes<br>39/101                                                                          |                     | No<br>67/224                    |                      | Yes<br>62/101                      |                     | No<br>157/224                    |                      | 0.12 |
| Newborn care and specific monitoring                                                   |                     |                                 |                      |                                    |                     |                                  |                      |      |
| Yes<br>96/293                                                                          |                     | No<br>10/32                     |                      | Yes<br>197/293                     |                     | No<br>22/32                      |                      | 0.86 |
| Lamb fostering to female animals other than their dams                                 |                     |                                 |                      |                                    |                     |                                  |                      |      |
| Yes<br>73/221                                                                          |                     | No<br>33/104                    |                      | Yes<br>148/221                     |                     | No<br>71/104                     |                      | 0.82 |

|                                                                         |              |                   |                      |                   |           |      |
|-------------------------------------------------------------------------|--------------|-------------------|----------------------|-------------------|-----------|------|
|                                                                         |              |                   |                      |                   |           |      |
|                                                                         |              |                   |                      |                   |           |      |
| Administration of a lamb-specific diet                                  |              |                   |                      |                   |           |      |
| Yes                                                                     |              | No                | Yes                  | No                |           |      |
| 75/226                                                                  |              | 31/99             | 151/226              | 68/99             |           | 0.74 |
| Age of lamb removal from their dams                                     |              |                   |                      |                   |           |      |
| < 45 days                                                               | 45 – 60 days | > 60 days         | < 45 days            | 45 – 60 days      | > 60 days |      |
| 35/119                                                                  | 61/170       | 10/36             | 84/119               | 109/170           | 26/36     | 0.41 |
| Seasonal transfer of animals to other site                              |              |                   |                      |                   |           |      |
| Yes                                                                     |              | No                | Yes                  | No                |           |      |
| 13/49                                                                   |              | 93/276            | 36/49                | 183/276           |           | 0.32 |
| Manure management                                                       |              |                   |                      |                   |           |      |
| Spread in the fields                                                    |              | Removed otherwise | Spread in the fields | Removed otherwise |           |      |
| 105/320                                                                 |              | 1/5               | 215/320              | 4/5               |           | 0.54 |
| Annual frequency of systemic disinfections in the farm                  |              |                   |                      |                   |           |      |
| 0 – 9                                                                   |              | > 9               | 0 – 9                | > 9               |           |      |
| 93/293                                                                  |              | 13/32             | 200/293              | 19/32             |           | 0.31 |
| Shearing of animals                                                     |              |                   |                      |                   |           |      |
| Yes                                                                     |              | No                | Yes                  | No                |           |      |
| 105/319                                                                 |              | 1/6               | 214/319              | 5/6               |           | 0.40 |
| Provision of finished feed (concentrate) to animals throughout the year |              |                   |                      |                   |           |      |
| Yes                                                                     |              | No                | Yes                  | No                |           |      |
| 99/304                                                                  |              | 7/21              | 205/304              | 14/21             |           | 0.94 |
| Provision of finished feed (concentrate) to young animals               |              |                   |                      |                   |           |      |
| Yes                                                                     |              | No                | Yes                  | No                |           |      |
| 83/255                                                                  |              | 23/70             | 172/255              | 47/70             |           | 0.96 |

**Table S9.** Associations of presence of *Giardia* in faecal samples from 119 goat herds in Greece, as found in univariable analysis.

| Number of farms                                                          |                         |                         |                   |                                                                             |                         |                         |                    | <i>p</i> |
|--------------------------------------------------------------------------|-------------------------|-------------------------|-------------------|-----------------------------------------------------------------------------|-------------------------|-------------------------|--------------------|----------|
| Farms with presence of <i>Giardia</i> in faecal samples ( <i>n</i> = 40) |                         |                         |                   | Farms with no presence of <i>Giardia</i> in faecal samples ( <i>n</i> = 79) |                         |                         |                    |          |
| Management system applied in the farm                                    |                         |                         |                   |                                                                             |                         |                         |                    |          |
| Intensive<br>3/9                                                         | Semi-intensive<br>10/29 | Semi-extensive<br>20/61 | Extensive<br>7/20 | Intensive<br>6/9                                                            | Semi-intensive<br>19/29 | Semi-extensive<br>41/61 | Extensive<br>13/20 | 0.99     |
| Years at the present location                                            |                         |                         |                   |                                                                             |                         |                         |                    |          |
| 0 – 2<br>0/1                                                             |                         | 3 – 5<br>5/15           | > 5<br>35/103     | 0 – 2<br>1/1                                                                |                         | 3 – 5<br>10/15          | > 5<br>68/103      | 0.77     |
| Month into the lactation period at sampling                              |                         |                         |                   |                                                                             |                         |                         |                    |          |
| 0–1st<br>3/8                                                             | 2nd–5th<br>19/60        | 6th–9th<br>15/43        | After 9th<br>3/8  | 0–1st<br>5/8                                                                | 2nd–5th<br>41/60        | 6th–9th<br>28/43        | After 9th<br>5/8   | 0.97     |
| Availability of a main building for animals                              |                         |                         |                   |                                                                             |                         |                         |                    |          |
|                                                                          | Yes<br>38/117           |                         | No<br>2/2         |                                                                             | Yes<br>79/117           |                         | No<br>0/2          | 0.045    |
| Availability of a designated building for kids                           |                         |                         |                   |                                                                             |                         |                         |                    |          |
|                                                                          | Yes<br>29/86            |                         | No<br>11/33       |                                                                             | Yes<br>57/86            |                         | No<br>22/33        | 0.89     |
| Availability of a designated kidding area                                |                         |                         |                   |                                                                             |                         |                         |                    |          |
|                                                                          | Yes<br>22/58            |                         | No<br>18/61       |                                                                             | Yes<br>36/58            |                         | No<br>43/61        | 0.33     |
| Availability of a lavatory                                               |                         |                         |                   |                                                                             |                         |                         |                    |          |
|                                                                          | Yes<br>15/38            |                         | No<br>25/81       |                                                                             | Yes<br>23/38            |                         | No<br>56/81        | 0.35     |
| Material of the floor of the barn                                        |                         |                         |                   |                                                                             |                         |                         |                    |          |
|                                                                          | Soil<br>36/105          |                         | Other<br>4/14     |                                                                             | Soil<br>69/105          |                         | Other<br>10/14     | 0.67     |
| Availability of straw bedding                                            |                         |                         |                   |                                                                             |                         |                         |                    |          |
|                                                                          | Yes<br>26/76            |                         | No<br>14/43       |                                                                             | Yes<br>50/76            |                         | No<br>29/43        | 0.85     |
| Annual frequency of removal / clean-up of the straw bedding              |                         |                         |                   |                                                                             |                         |                         |                    |          |
|                                                                          | 1 – 2<br>16/42          |                         | > 2<br>10/34      |                                                                             | 1 – 2<br>26/44          |                         | > 2<br>24/34       | 0.43     |
| Grazing practiced                                                        |                         |                         |                   |                                                                             |                         |                         |                    |          |
|                                                                          | Yes<br>38/113           |                         | No<br>2/6         |                                                                             | Yes<br>75/113           |                         | No<br>4/6          | 0.99     |



|                                                                                        |           |                       |               |                          |           |                       |               |      |
|----------------------------------------------------------------------------------------|-----------|-----------------------|---------------|--------------------------|-----------|-----------------------|---------------|------|
| Grazing land available to animals                                                      |           |                       |               |                          |           |                       |               |      |
| 0 – 0.5 acre per animals                                                               |           | > 0.5 acre per animal |               | 0 – 0.5 acre per animals |           | > 0.5 acre per animal |               | 0.69 |
| 5/17                                                                                   |           | 35/102                |               | 12/17                    |           | 67/102                |               |      |
| No. of female animals in the farm                                                      |           |                       |               |                          |           |                       |               |      |
| 0 – 165                                                                                | 166 – 330 | 331 – 500             | > 500         | 0 – 165                  | 166 – 330 | 331 – 500             | > 500         | 0.11 |
| 21/57                                                                                  | 7/36      | 7/13                  | 5/13          | 36/57                    | 29/36     | 6/13                  | 8/13          |      |
| Breed of does                                                                          |           |                       |               |                          |           |                       |               |      |
| Cross-breeds                                                                           |           | Greek breeds          |               | Imported breeds          |           | Imported breeds       |               | 0.73 |
| 6/18                                                                                   |           | 17/56                 |               | 17/45                    |           | 28/45                 |               |      |
| Month of the start of the kidding season                                               |           |                       |               |                          |           |                       |               |      |
| All year                                                                               | Autumn    | Winter                | Spring-Summer | All year                 | Autumn    | Winter                | Spring-Summer | 0.93 |
| 3/8                                                                                    | 20/63     | 16/44                 | 1/4           | 5/8                      | 43/63     | 28/44                 | 3/4           |      |
| Collaboration with a veterinarian                                                      |           |                       |               |                          |           |                       |               |      |
| Yes                                                                                    |           | No                    |               | Yes                      |           | No                    |               | 0.57 |
| 35/101                                                                                 |           | 5/18                  |               | 66/101                   |           | 13/18                 |               |      |
| Use of laboratory diagnostic examinations in faecal samples preventively               |           |                       |               |                          |           |                       |               |      |
| Yes                                                                                    |           | No                    |               | Yes                      |           | No                    |               | 0.72 |
| 6/16                                                                                   |           | 34/103                |               | 10/16                    |           | 69/103                |               |      |
| Means of calculating live bodyweight for the administration of pharmaceutical products |           |                       |               |                          |           |                       |               |      |
| Weighing                                                                               |           | Estimation            |               | Weighing                 |           | Estimation            |               | 0.37 |
| 11/27                                                                                  |           | 29/92                 |               | 16/27                    |           | 63/92                 |               |      |
| Routine overdosing (compared to dose prescribed) of pharmaceuticals                    |           |                       |               |                          |           |                       |               |      |
| Yes                                                                                    |           | No                    |               | Yes                      |           | No                    |               | 0.29 |
| 11/26                                                                                  |           | 29/93                 |               | 15/26                    |           | 64/93                 |               |      |
| Total visits made annually by veterinarians to the farm during the preceding season    |           |                       |               |                          |           |                       |               |      |
| 0 – 4                                                                                  | 5 – 7     | > 7                   |               | 0 – 4                    | 5 – 7     | > 7                   |               | 0.96 |
| 17/51                                                                                  | 9/25      | 14/43                 |               | 34/51                    | 16/25     | 29/43                 |               |      |
| Application of reproductive control practices in the farm                              |           |                       |               |                          |           |                       |               |      |
| Yes                                                                                    |           | No                    |               | Yes                      |           | No                    |               | 0.20 |
| 8/17                                                                                   |           | 32/102                |               | 9/17                     |           | 70/102                |               |      |
| Newborn care and specific monitoring                                                   |           |                       |               |                          |           |                       |               |      |
| Yes                                                                                    |           | No                    |               | Yes                      |           | No                    |               | 0.80 |
| 37/109                                                                                 |           | 3/10                  |               | 72/109                   |           | 7/10                  |               |      |
| Kid fostering to female animals other than their dams                                  |           |                       |               |                          |           |                       |               |      |
| Yes                                                                                    |           | No                    |               | Yes                      |           | No                    |               | 0.36 |
| 31/86                                                                                  |           | 9/33                  |               | 55/86                    |           | 24/137                |               |      |

|                                                                         |                   |                      |                   |              |           |
|-------------------------------------------------------------------------|-------------------|----------------------|-------------------|--------------|-----------|
|                                                                         |                   |                      |                   |              |           |
| Administration of a kid- specific diet                                  |                   |                      |                   |              |           |
| Yes                                                                     | No                | Yes                  | No                |              |           |
| 27/79                                                                   | 13/40             | 52/79                | 27/40             |              | 0.85      |
| Age of kid removal from their dams                                      |                   |                      |                   |              |           |
| < 45 days                                                               | 45 – 60 days      | > 60 days            | < 45 days         | 45 – 60 days | > 60 days |
| 8/26                                                                    | 13/44             | 19/49                | 18/26             | 31/44        | 30/49     |
|                                                                         |                   |                      |                   |              | 0.60      |
| Seasonal transfer of animals to other site                              |                   |                      |                   |              |           |
| Yes                                                                     | No                | Yes                  | No                |              |           |
| 8/28                                                                    | 32/91             | 20/28                | 59/91             |              | 0.52      |
| Manure management                                                       |                   |                      |                   |              |           |
| Spread in the fields                                                    | Removed otherwise | Spread in the fields | Removed otherwise |              |           |
| 37/109                                                                  | 3/10              | 72/109               | 7/10              |              | 0.80      |
| Annual frequency of systemic disinfections in the farm                  |                   |                      |                   |              |           |
| 0 – 9                                                                   | > 9               | 0 – 9                | > 9               |              |           |
| 36/100                                                                  | 4/19              | 64/100               | 15/19             |              | 0.21      |
| Shearing of animals                                                     |                   |                      |                   |              |           |
| Yes                                                                     | No                | Yes                  | No                |              |           |
| 35/102                                                                  | 5/17              | 67/12                | 12/17             |              | 0.69      |
| Provision of finished feed (concentrate) to animals throughout the year |                   |                      |                   |              |           |
| Yes                                                                     | No                | Yes                  | No                |              |           |
| 34/103                                                                  | 6/16              | 69/103               | 10/16             |              | 0.72      |
| Provision of finished feed (concentrate) to young animals               |                   |                      |                   |              |           |
| Yes                                                                     | No                | Yes                  | No                |              |           |
| 27/79                                                                   | 13/40             | 52/79                | 27/40             |              | 0.85      |

**Table S10.** Associations of presence of *Cryptosporidium* in faecal samples from 325 sheep flocks in Greece, as found in univariable analysis.

| Number of farms                                                          |                         |                         |                   |                                                                              |                           |                           |                    | <i>p</i> |
|--------------------------------------------------------------------------|-------------------------|-------------------------|-------------------|------------------------------------------------------------------------------|---------------------------|---------------------------|--------------------|----------|
| Farms with presence of <i>Giardia</i> in faecal samples ( <i>n</i> = 23) |                         |                         |                   | Farms with no presence of <i>Giardia</i> in faecal samples ( <i>n</i> = 302) |                           |                           |                    |          |
| Management system applied in the farm                                    |                         |                         |                   |                                                                              |                           |                           |                    |          |
| Intensive<br>14/43                                                       | Semi-intensive<br>8/151 | Semi-extensive<br>1/107 | Extensive<br>0/24 | Intensive<br>29/43                                                           | Semi-intensive<br>143/151 | Semi-extensive<br>106/107 | Extensive<br>24/24 | < 0.0001 |
| Years at the present location                                            |                         |                         |                   |                                                                              |                           |                           |                    |          |
| 0 – 2<br>2/5                                                             | 3 – 5<br>2/40           | > 5<br>19/280           | 0 – 2<br>3/5      | 3 – 5<br>38/40                                                               | > 5<br>261/280            |                           |                    | 0.014    |
| Month into the lactation period at sampling                              |                         |                         |                   |                                                                              |                           |                           |                    |          |
| 0–1st<br>2/23                                                            | 2nd–5th<br>7/138        | 6th–9th<br>12/147       | After 9th<br>2/17 | 0–1st<br>21/23                                                               | 2nd–5th<br>131/138        | 6th–9th<br>135/147        | After 9th<br>15/17 | 0.62     |
| Availability of a main building for animals                              |                         |                         |                   |                                                                              |                           |                           |                    |          |
| Yes<br>23/318                                                            | No<br>0/7               | Yes<br>295/318          | No<br>7/7         |                                                                              |                           |                           |                    | 0.46     |
| Availability of a designated building for lambs                          |                         |                         |                   |                                                                              |                           |                           |                    |          |
| Yes<br>21/243                                                            | No<br>2/82              | Yes<br>222/243          | No<br>80/82       |                                                                              |                           |                           |                    | 0.06     |
| Availability of a designated lambing area                                |                         |                         |                   |                                                                              |                           |                           |                    |          |
| Yes<br>12/173                                                            | No<br>11/152            | Yes<br>161/173          | No<br>141/152     |                                                                              |                           |                           |                    | 0.92     |
| Availability of a lavatory                                               |                         |                         |                   |                                                                              |                           |                           |                    |          |
| Yes<br>14/143                                                            | No<br>9/182             | Yes<br>129/143          | No<br>173/182     |                                                                              |                           |                           |                    | 0.09     |
| Material of the floor of the barn                                        |                         |                         |                   |                                                                              |                           |                           |                    |          |
| Soil<br>19/292                                                           | Other<br>4/33           | Soil<br>273/292         | Other<br>29/33    |                                                                              |                           |                           |                    | 0.23     |
| Availability of straw bedding                                            |                         |                         |                   |                                                                              |                           |                           |                    |          |
| Yes<br>21/268                                                            | No<br>2/57              | Yes<br>247/268          | No<br>55/57       |                                                                              |                           |                           |                    | 0.25     |
| Annual frequency of removal / clean-up of the straw bedding              |                         |                         |                   |                                                                              |                           |                           |                    |          |
| 1 – 2<br>10/164                                                          | > 2<br>11/102           | 1 – 2<br>156/164        | > 2<br>91/102     |                                                                              |                           |                           |                    | 0.16     |
| Grazing practiced                                                        |                         |                         |                   |                                                                              |                           |                           |                    |          |
| Yes<br>10/281                                                            | No<br>13/44             | Yes<br>271/281          | No<br>31/44       |                                                                              |                           |                           |                    | < 0.0001 |

|                                                                                        |                    |                                |                      |                                    |                      |                                  |                      |                         |                            |      |
|----------------------------------------------------------------------------------------|--------------------|--------------------------------|----------------------|------------------------------------|----------------------|----------------------------------|----------------------|-------------------------|----------------------------|------|
| Grazing land available to animals                                                      |                    |                                |                      |                                    |                      |                                  |                      |                         |                            |      |
| 0 – 0.5 acre per animals<br>19/118                                                     |                    | > 0.5 acre per animal<br>4/207 |                      | 0 – 0.5 acre per animals<br>99/118 |                      | > 0.5 acre per animal<br>203/207 |                      | < 0.0001                |                            |      |
| No. of female animals in the farm                                                      |                    |                                |                      |                                    |                      |                                  |                      |                         |                            |      |
| 0 – 165<br>4/87                                                                        | 166 – 330<br>6/121 | 331 – 500<br>7/66              | > 500<br>6/51        | 0 – 165<br>83/87                   | 166 – 330<br>115/121 | 331 – 500<br>59/66               | > 500<br>45/51       | 0.21                    |                            |      |
| Breed of ewes                                                                          |                    |                                |                      |                                    |                      |                                  |                      |                         |                            |      |
| Cross-breeds<br>0/43                                                                   |                    | Greek breeds<br>8/143          |                      | Imported breeds<br>15/139          |                      | Cross-breeds<br>43/43            |                      | Greek breeds<br>135/143 | Imported breeds<br>144/139 | 0.07 |
| Month of the start of the lambing season                                               |                    |                                |                      |                                    |                      |                                  |                      |                         |                            |      |
| All year<br>4/18                                                                       | Autumn<br>11/245   | Winter<br>6/55                 | Spring-Summer<br>2/7 | All year<br>14/18                  | Autumn<br>234/245    | Winter<br>49/55                  | Spring-Summer<br>5/7 | 0.002                   |                            |      |
| Collaboration with a veterinarian                                                      |                    |                                |                      |                                    |                      |                                  |                      |                         |                            |      |
| Yes<br>21/277                                                                          |                    | No<br>2/48                     |                      | Yes<br>256/277                     |                      | No<br>46/48                      |                      | 0.39                    |                            |      |
| Use of laboratory diagnostic examinations in faecal samples preventively               |                    |                                |                      |                                    |                      |                                  |                      |                         |                            |      |
| Yes<br>4/34                                                                            |                    | No<br>19/291                   |                      | Yes<br>30/34                       |                      | No<br>272/291                    |                      | 0.26                    |                            |      |
| Means of calculating live bodyweight for the administration of pharmaceutical products |                    |                                |                      |                                    |                      |                                  |                      |                         |                            |      |
| Weighing<br>3/73                                                                       |                    | Estimation<br>20/252           |                      | Weighing<br>70/73                  |                      | Estimation<br>232/252            |                      | 0.26                    |                            |      |
| Routine overdosing (compared to dose prescribed) of pharmaceuticals                    |                    |                                |                      |                                    |                      |                                  |                      |                         |                            |      |
| Yes<br>7/61                                                                            |                    | No<br>16/264                   |                      | Yes<br>54/61                       |                      | No<br>248/264                    |                      | 0.14                    |                            |      |
| Total visits made annually by veterinarians to the farm during the preceding season    |                    |                                |                      |                                    |                      |                                  |                      |                         |                            |      |
| 0 – 4<br>11/139                                                                        | 5 – 7<br>4/86      | > 7<br>8/100                   | 0 – 4<br>128/139     | 5 – 7<br>82/86                     | > 7<br>92/100        | 0.59                             |                      |                         |                            |      |
| Application of reproductive control practices in the farm                              |                    |                                |                      |                                    |                      |                                  |                      |                         |                            |      |
| Yes<br>9/101                                                                           |                    | No<br>14/224                   |                      | Yes<br>92/101                      |                      | No<br>210/224                    |                      | 0.39                    |                            |      |
| Newborn care and specific monitoring                                                   |                    |                                |                      |                                    |                      |                                  |                      |                         |                            |      |
| Yes<br>22/293                                                                          |                    | No<br>1/32                     |                      | Yes<br>271/293                     |                      | No<br>31/32                      |                      | 0.36                    |                            |      |
| Lamb fostering to female animals other than their dams                                 |                    |                                |                      |                                    |                      |                                  |                      |                         |                            |      |
| Yes<br>11/221                                                                          |                    | No<br>12/104                   |                      | Yes<br>210/221                     |                      | No<br>92/104                     |                      | 0.031                   |                            |      |

|                                                                         |                   |                      |                   |              |           |      |
|-------------------------------------------------------------------------|-------------------|----------------------|-------------------|--------------|-----------|------|
|                                                                         |                   |                      |                   |              |           |      |
| Administration of a lamb-specific diet                                  |                   |                      |                   |              |           |      |
| Yes                                                                     | No                | Yes                  | No                |              |           |      |
| 15/226                                                                  | 8/99              | 211/226              | 91/99             | 0.64         |           |      |
| Age of lamb removal from their dams                                     |                   |                      |                   |              |           |      |
| < 45 days                                                               | 45 – 60 days      | > 60 days            | < 45 days         | 45 – 60 days | > 60 days |      |
| 9/119                                                                   | 12/170            | 2/36                 | 110/119           | 158/170      | 34/36     | 0.92 |
| Seasonal transfer of animals to other site                              |                   |                      |                   |              |           |      |
| Yes                                                                     | No                | Yes                  | No                |              |           |      |
| 2/49                                                                    | 21/276            | 47/49                | 255/276           | 0.37         |           |      |
| Manure management                                                       |                   |                      |                   |              |           |      |
| Spread in the fields                                                    | Removed otherwise | Spread in the fields | Removed otherwise |              |           |      |
| 23/320                                                                  | 0/5               | 297/320              | 5/5               | 0.53         |           |      |
| Annual frequency of systemic disinfections in the farm                  |                   |                      |                   |              |           |      |
| 0 – 9                                                                   | > 9               | 0 – 9                | > 9               |              |           |      |
| 18/293                                                                  | 5/32              | 275/293              | 27/32             | 0.047        |           |      |
| Shearing of animals                                                     |                   |                      |                   |              |           |      |
| Yes                                                                     | No                | Yes                  | No                |              |           |      |
| 23/319                                                                  | 0/6               | 296/319              | 6/6               | 0.50         |           |      |
| Provision of finished feed (concentrate) to animals throughout the year |                   |                      |                   |              |           |      |
| Yes                                                                     | No                | Yes                  | No                |              |           |      |
| 23/304                                                                  | 0/21              | 281/304              | 21/21             | 0.19         |           |      |
| Provision of finished feed (concentrate) to young animals               |                   |                      |                   |              |           |      |
| Yes                                                                     | No                | Yes                  | No                |              |           |      |
| 18/255                                                                  | 5/70              | 237/255              | 65/70             | 0.98         |           |      |

**Table S11.** Associations of presence of *Cryptosporidium* in faecal samples from 119 goat herds in Greece, as found in univariable analysis.

| Number of farms                                                                  |                        |                        |                   |                                                                                      |                         |                         |                    | <i>p</i> |
|----------------------------------------------------------------------------------|------------------------|------------------------|-------------------|--------------------------------------------------------------------------------------|-------------------------|-------------------------|--------------------|----------|
| Farms with presence of <i>Cryptosporidium</i> in faecal samples ( <i>n</i> = 13) |                        |                        |                   | Farms with no presence of <i>Cryptosporidium</i> in faecal samples ( <i>n</i> = 106) |                         |                         |                    |          |
| Management system applied in the farm                                            |                        |                        |                   |                                                                                      |                         |                         |                    |          |
| Intensive<br>6/9                                                                 | Semi-intensive<br>7/29 | Semi-extensive<br>0/61 | Extensive<br>0/20 | Intensive<br>3/9                                                                     | Semi-intensive<br>22/29 | Semi-extensive<br>61/61 | Extensive<br>20/20 | < 0.0001 |
| Years at the present location                                                    |                        |                        |                   |                                                                                      |                         |                         |                    |          |
| 0 – 2<br>0/1                                                                     |                        | 3 – 5<br>2/15          | > 5<br>11/103     | 0 – 2<br>1/1                                                                         |                         | 3 – 5<br>13/15          | > 5<br>92/103      | 0.90     |
| Month into the lactation period at sampling                                      |                        |                        |                   |                                                                                      |                         |                         |                    |          |
| 0–1st<br>1/8                                                                     | 2nd–5th<br>5/60        | 6th–9th<br>5/43        | After 9th<br>2/8  | 0–1st<br>7/8                                                                         | 2nd–5th<br>55/60        | 6th–9th<br>38/43        | After 9th<br>6/8   | 0.55     |
| Availability of a main building for animals                                      |                        |                        |                   |                                                                                      |                         |                         |                    |          |
|                                                                                  | Yes<br>13/117          |                        | No<br>0/2         |                                                                                      | Yes<br>104/117          |                         | No<br>2/2          | 0.62     |
| Availability of a designated building for lambs / kids                           |                        |                        |                   |                                                                                      |                         |                         |                    |          |
|                                                                                  | Yes<br>10/86           |                        | No<br>3/33        |                                                                                      | Yes<br>83/86            |                         | No<br>30/33        | 0.79     |
| Availability of a dedicated lambing / kidding area                               |                        |                        |                   |                                                                                      |                         |                         |                    |          |
|                                                                                  | Yes<br>5/58            |                        | No<br>8/61        |                                                                                      | Yes<br>53/58            |                         | No<br>53/61        | 0.43     |
| Availability of a lavatory                                                       |                        |                        |                   |                                                                                      |                         |                         |                    |          |
|                                                                                  | Yes<br>6/38            |                        | No<br>7/81        |                                                                                      | Yes<br>32/38            |                         | No<br>74/81        | 0.24     |
| Material of the floor of the barn                                                |                        |                        |                   |                                                                                      |                         |                         |                    |          |
|                                                                                  | Soil<br>12/105         |                        | Other<br>1/14     |                                                                                      | Soil<br>93/105          |                         | Other<br>13/14     | 0.63     |
| Availability of straw bedding                                                    |                        |                        |                   |                                                                                      |                         |                         |                    |          |
|                                                                                  | Yes<br>11/76           |                        | No<br>2/43        |                                                                                      | Yes<br>65/76            |                         | No<br>41/43        | 0.10     |
| Annual frequency of removal / clean-up of the straw bedding                      |                        |                        |                   |                                                                                      |                         |                         |                    |          |
|                                                                                  | 1 – 2<br>3/42          |                        | > 2<br>8/34       |                                                                                      | 1 – 2<br>39/42          |                         | > 2<br>26/34       | 0.044    |
| Grazing practiced                                                                |                        |                        |                   |                                                                                      |                         |                         |                    |          |
|                                                                                  | Yes<br>9/113           |                        | No<br>4/6         |                                                                                      | Yes<br>104/113          |                         | No<br>2/6          | < 0.0001 |

|                                                                                        |                   |                                |                      |                                   |                    |                                 |                      |                       |                          |       |
|----------------------------------------------------------------------------------------|-------------------|--------------------------------|----------------------|-----------------------------------|--------------------|---------------------------------|----------------------|-----------------------|--------------------------|-------|
| Grazing land available to animals                                                      |                   |                                |                      |                                   |                    |                                 |                      |                       |                          |       |
| 0 – 0.5 acre per animals<br>7/17                                                       |                   | > 0.5 acre per animal<br>6/102 |                      | 0 – 0.5 acre per animals<br>10/17 |                    | > 0.5 acre per animal<br>96/102 |                      | < 0.0001              |                          |       |
| No. of female animals in the farm                                                      |                   |                                |                      |                                   |                    |                                 |                      |                       |                          |       |
| 0 – 165<br>4/57                                                                        | 166 – 330<br>3/36 | 331 – 500<br>5/13              | > 500<br>1/13        | 0 – 165<br>53/57                  | 166 – 330<br>33/36 | 331 – 500<br>8/13               | > 500<br>12/13       | 0.010                 |                          |       |
| Breed of ewes / does                                                                   |                   |                                |                      |                                   |                    |                                 |                      |                       |                          |       |
| Cross-breeds<br>1/18                                                                   |                   | Greek breeds<br>2/56           |                      | Imported breeds<br>10/45          |                    | Cross-breeds<br>17/18           |                      | Greek breeds<br>54/56 | Imported breeds<br>35/45 | 0.008 |
| Month of the start of the lambing / kidding season                                     |                   |                                |                      |                                   |                    |                                 |                      |                       |                          |       |
| All year<br>4/8                                                                        | Autumn<br>3/62    | Winter<br>6/44                 | Spring-Summer<br>0/5 | All year<br>4/8                   | Autumn<br>59/62    | Winter<br>38/44                 | Spring-Summer<br>5/5 | 0.001                 |                          |       |
| Collaboration with a veterinarian                                                      |                   |                                |                      |                                   |                    |                                 |                      |                       |                          |       |
| Yes<br>11/101                                                                          |                   | No<br>2/18                     |                      | Yes<br>90/101                     |                    | No<br>16/18                     |                      | 0.98                  |                          |       |
| Use of laboratory diagnostic examinations in faecal samples preventively               |                   |                                |                      |                                   |                    |                                 |                      |                       |                          |       |
| Yes<br>4/16                                                                            |                   | No<br>9/103                    |                      | Yes<br>12/16                      |                    | No<br>94/103                    |                      | 0.05                  |                          |       |
| Means of calculating live bodyweight for the administration of pharmaceutical products |                   |                                |                      |                                   |                    |                                 |                      |                       |                          |       |
| Weighing<br>4/87                                                                       |                   | Estimation<br>9/32             |                      | Weighing<br>83/87                 |                    | Estimation<br>23/32             |                      | 0.0003                |                          |       |
| Routine overdosing (compared to dose prescribed) of pharmaceuticals                    |                   |                                |                      |                                   |                    |                                 |                      |                       |                          |       |
| Yes<br>2/26                                                                            |                   | No<br>11/93                    |                      | Yes<br>24/26                      |                    | No<br>82/93                     |                      | 0.55                  |                          |       |
| Total visits made annually by veterinarians to the farm during the preceding season    |                   |                                |                      |                                   |                    |                                 |                      |                       |                          |       |
| 0 – 4<br>6/51                                                                          | 5 – 7<br>3/25     | > 7<br>4/43                    |                      | 0 – 4<br>45/51                    | 5 – 7<br>22/25     | > 7<br>39/43                    |                      | 0.91                  |                          |       |
| Application of reproductive control practices in the farm                              |                   |                                |                      |                                   |                    |                                 |                      |                       |                          |       |
| Yes<br>4/17                                                                            |                   | No<br>9/102                    |                      | Yes<br>13/17                      |                    | No<br>93/102                    |                      | 0.07                  |                          |       |
| Newborn care and specific monitoring                                                   |                   |                                |                      |                                   |                    |                                 |                      |                       |                          |       |
| Yes<br>13/109                                                                          |                   | No<br>0/10                     |                      | Yes<br>96/109                     |                    | No<br>10/10                     |                      | 0.25                  |                          |       |
| Kid fostering to female animals other than their dams                                  |                   |                                |                      |                                   |                    |                                 |                      |                       |                          |       |
| Yes<br>6/86                                                                            |                   | No<br>7/33                     |                      | Yes<br>80/86                      |                    | No<br>26/33                     |                      | 0.026                 |                          |       |

|                                                                         |                   |                      |                   |              |           |
|-------------------------------------------------------------------------|-------------------|----------------------|-------------------|--------------|-----------|
|                                                                         |                   |                      |                   |              |           |
| Administration of a kid-specific diet                                   |                   |                      |                   |              |           |
| Yes                                                                     | No                | Yes                  | No                |              |           |
| 9/88                                                                    | 4/31              | 79/88                | 27/31             |              | 0.68      |
| Age of kid removal from their dams                                      |                   |                      |                   |              |           |
| < 45 days                                                               | 45 – 60 days      | > 60 days            | < 45 days         | 45 – 60 days | > 60 days |
| 5/26                                                                    | 5/44              | 3/49                 | 21/26             | 39/44        | 46/49     |
|                                                                         |                   |                      |                   |              | 0.22      |
| Seasonal transfer of animals to other site                              |                   |                      |                   |              |           |
| Yes                                                                     | No                | Yes                  | No                |              |           |
| 2/28                                                                    | 11/91             | 26/28                | 80/91             |              | 0.46      |
| Manure management                                                       |                   |                      |                   |              |           |
| Spread in the fields                                                    | Removed otherwise | Spread in the fields | Removed otherwise |              |           |
| 11/109                                                                  | 2/10              | 98/109               | 8/10              |              | 0.34      |
| Annual frequency of systemic disinfections in the farm                  |                   |                      |                   |              |           |
| 0 – 9                                                                   | > 9               | 0 – 9                | > 9               |              |           |
| 10/100                                                                  | 3/19              | 90/100               | 16/19             |              | 0.46      |
| Shearing of animals                                                     |                   |                      |                   |              |           |
| Yes                                                                     | No                | Yes                  | No                |              |           |
| 10/102                                                                  | 3/17              | 92/102               | 14/17             |              | 0.34      |
| Provision of finished feed (concentrate) to animals throughout the year |                   |                      |                   |              |           |
| Yes                                                                     | No                | Yes                  | No                |              |           |
| 13/103                                                                  | 0/16              | 90/103               | 16/16             |              | 0.13      |
| Provision of finished feed (concentrate) to young animals               |                   |                      |                   |              |           |
| Yes                                                                     | No                | Yes                  | No                |              |           |
| 9/79                                                                    | 4/40              | 70/79                | 36/40             |              | 0.82      |
